# Supplementary material for: The Replacement of Only One Portion of Starchy Carbohydrates with Green Leafy Vegetables Regresses Mid and Advanced Stages of NAFLD: Results from a Prospective Pilot Study
Source: MDPI journal article supplement (doi:10.3390/nu15102289), 2023-05-12
Supplement: s1 [file s1]

**Table S1.** Correlation <sup>‡</sup> between weight loss and blood and liver parameters.

| Parameters *                      |                      |
|-----------------------------------|----------------------|
| FPG (mg/dL)                       | 0.15 (0.47)          |
| Insulin (μUI/mL)                  | 0.16 (0.46)          |
| HOMA-IR (mg/dL)                   | 0.15 (0.48)          |
| HbA1c (mmol/mol)                  | 0.06 (0.78)          |
| Triglycerides (mg/dL)             | 0.24 (0.26)          |
| LDL (mg/dl)                       | -0.28 (0.19)         |
| HDL (mg/dl)                       | -0.24 (0.27)         |
| Total Cholesterol (mg/dl)         | -0.07 (0.75)         |
| TSH (μUI/mL)                      | 0.02 (0.93)          |
| FT3 (pg/mL)                       | 0.26 (0.22)          |
| FT4 (ng/mL)                       | 0.18 (0.40)          |
| Vitamin D (ng/mL)                 | 0.13 (0.54)          |
| Uric Acid (mg/dL)                 | 0.02 (0.91)          |
| Creatinine (mg/dL)                | -0.15 (0.48)         |
| GFR (mL/min/1.73 m <sup>2</sup> ) | 0.10 (0.63)          |
| AST (U/L)                         | 0.16 (0.46)          |
| ALT (U/L)                         | 0.27 (0.20)          |
| GGT (U/L)                         | 0.31 (0.14)          |
| Ferritin (ng/ml)                  | -0.14 (0.51)         |
| PTH (pg/mL)                       | 0.17 (0.42)          |
| proBNP (pg/mL)                    | -0.09 (0.66)         |
| Albumin (g/dL)                    | -0.03 (0.88)         |
| Fibroscan CAP (dB/m)              | 0.25 (0.24)          |
| Fibroscan E (kPA)                 | -0.09 (0.67)         |
| <b>FM (Kg)</b>                    | <b>0.63 (0.001)</b>  |
| FFM (Kg)                          | 0.04 (0.84)          |
| TBW (L)                           | 0.10 (0.62)          |
| ECW (L)                           | 0.02 (0.94)          |
| SMM (Kg)                          | -0.03 (0.88)         |
| <b>FLI</b>                        | <b>0.68 (0.0004)</b> |
| FAST                              | 0.06 (0.78)          |

<sup>‡</sup> rho, Spearman correlation coefficient.
